# Supplementary material for: Genome-Wide Association Study Reveals That PvGUX1_1 Is Associated with Pod Stringlessness in Snap Bean (Phaseolus vulgaris L.)
Source: MDPI journal article supplement (doi:10.3390/biology11040611), 2022-04-18
Supplement: s1 [file s1]

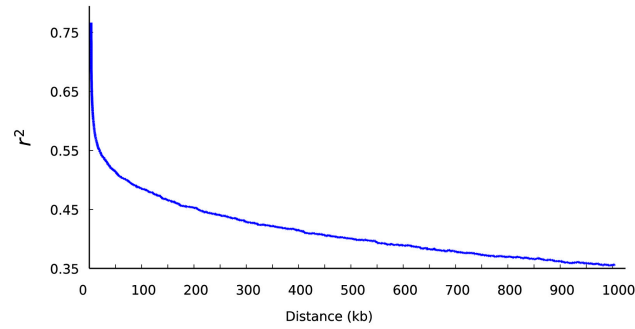

**Figure S1.** Decay of linkage disequilibrium (LD) in the snap bean genome.

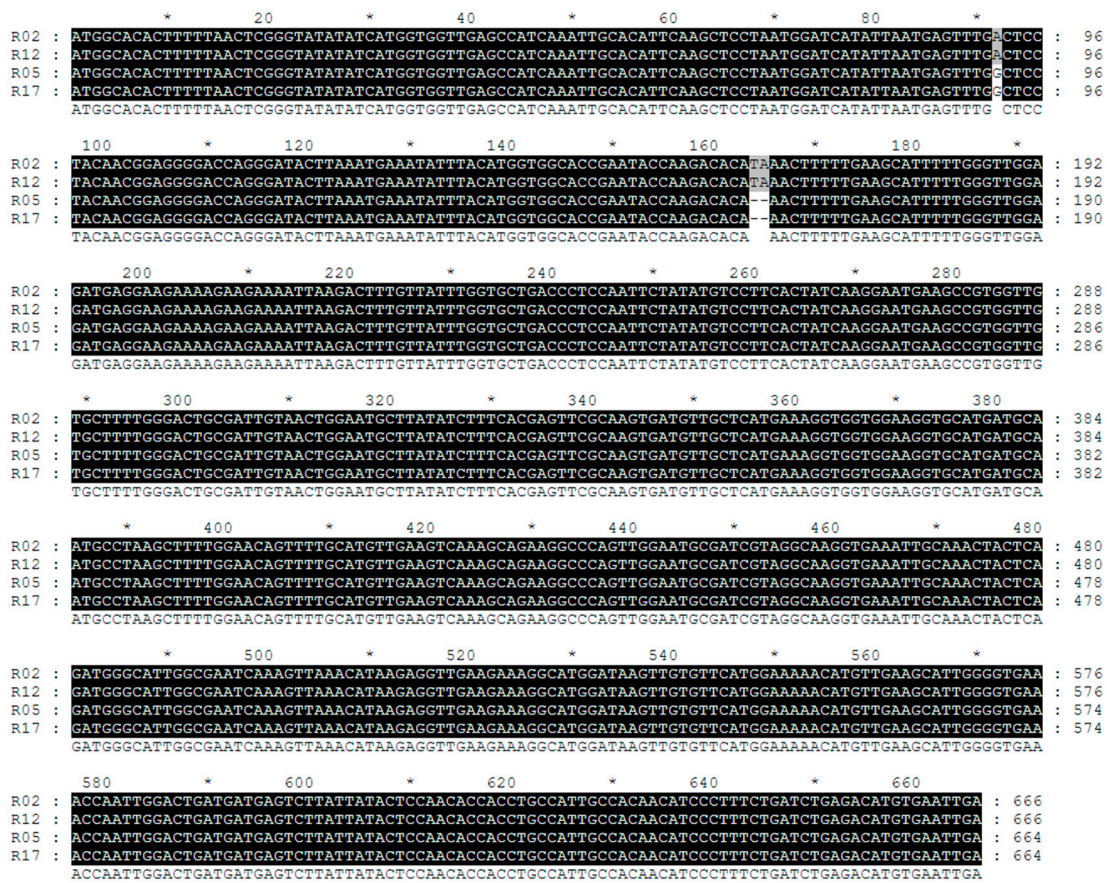

**Figure S2.** Sequence alignment of Phvul.002G270800 in four different accessions. R02 and R12 are stringless; R05 and R17 have suture strings.

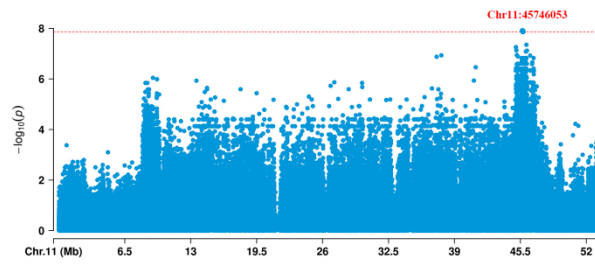

**Figure S3.** The Manhattan plots of ST1-2019 on chromosome 11. The red dashed line represents the threshold.

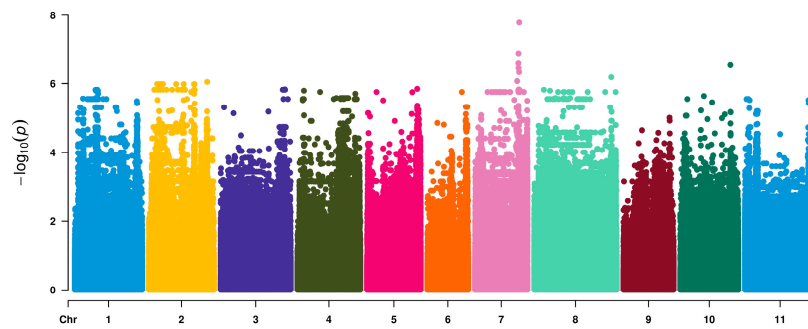

**Figure S4.** The Manhattan plots of GWAS for stringy snap bean on ST1-2019.

**Table S1.** List of common bean germplasm used in this study including ID, name, type of accession, variation of 2bp and source of data. + indicates exist of 2bp; - for 2bp deletion; u for unknown. IVF\_CAAS for Institute of Vegetables and Flowers, Chinese Academy of Agricultural Sciences.

| ID  | Name    | Genepool     | 2-bp | Source   | ST1_201<br>9 | ST2_2019 | ST1_202<br>0 | ST2_2<br>020 |
|-----|---------|--------------|------|----------|--------------|----------|--------------|--------------|
| R01 | 8030    | Mesoamerican | +    | IVF CAAS | 0            | 0        | 0            | 0            |
| R02 | 15B5    | Mesoamerican | +    | IVF CAAS | 0            | 0        | 0            | 0            |
| R03 | 17B1-1  | Mesoamerican | -    | IVF CAAS | 1            | 1        | 1            | 1            |
| R04 | 14-2    | Mesoamerican | -    | IVF CAAS | 1            | 1        | 0.54         | 1            |
| R05 | 09B2    | Mesoamerican | -    | IVF CAAS | 1            | 1        | 1            | 1            |
| R06 | 96B44-1 | Mesoamerican | -    | IVF CAAS | 1            | 1        | 1            | 1            |
| R07 | 17B2    | Mesoamerican | -    | IVF CAAS | 1            | 1        | 1            | 1            |
| R08 | 09B5    | Mesoamerican | -    | IVF CAAS | 1            | 1        | 1            | 1            |
| R09 | 15B8    | Mesoamerican | -    | IVF CAAS | 1            | 1        | 1            | 1            |
| R10 | 16B1    | Mesoamerican | +    | IVF CAAS | 0            | 0        | 0            | 0            |
| R11 | 17B4    | Mesoamerican | -    | IVF CAAS | 1            | 1        | 1            | 1            |
| R12 | 10B7    | Mesoamerican | +    | IVF CAAS | 0            | 0        | 0            | 0            |
| R13 | 10B4    | Mesoamerican | +    | IVF CAAS | 0.36         | 1        | 0            | 0            |
| R14 | 15-28   | Mesoamerican | +    | IVF CAAS | 0            | 0        | 0            | 0            |
| R15 | 17B3-1  | Mesoamerican | -    | IVF CAAS | 1            | 1        | 1            | 1            |
| R16 | 18B4    | Mesoamerican | -    | IVF CAAS | 1            | 1        | 1            | 1            |
| R17 | 16B3    | Mesoamerican | -    | IVF CAAS | 1            | 1        | 1            | 1            |
| R18 | 15-68   | Mesoamerican | -    | IVF CAAS | 1            | 1        | 1            | 1            |
| R19 | 15-69   | Mesoamerican | +    | IVF CAAS | 0            | 0        | 0            | 0            |
| R20 | 15-73   | Mesoamerican | +    | IVF CAAS | 0            | 0        | 0            | 0            |
| R21 | 82-3    | Mesoamerican | +    | IVF CAAS | 0            | 0        | 0            | 0            |
| R22 | 82-62   | Andean       | +    | IVF CAAS | 0            | 0        | 0            | 0            |
| R23 | 12B3    | Mesoamerican | +    | IVF CAAS | 0            | 0        | 0            | 0            |
| R25 | 15-20   | Mesoamerican | +    | IVF CAAS | 0            | 0        | 0            | 0            |
| R26 | 15-22-1 | Mesoamerican | +    | IVF CAAS | 0            | 0        | 0            | 0            |
| R27 | 15-30-1 | Mesoamerican | +    | IVF CAAS | 0.17         | 1        | 0            | 0            |
| R28 | 15-32-2 | Mesoamerican | +    | IVF CAAS | 0.27         | 1        | 0            | 0            |
| R29 | 15-39-1 | Mesoamerican | +    | IVF CAAS | 0            | 0        | 0            | 0            |
| R30 | 15-74-2 | Mesoamerican | +    | IVF CAAS | 0            | 0        | 0            | 0            |
| R31 | 17B12   | Mesoamerican | -    | IVF CAAS | 0.68         | 1        | 1            | 1            |
| R32 | 17B8    | Mesoamerican | -    | IVF CAAS | 1            | 1        | 1            | 1            |
| R33 | 16B2    | Andean       | +    | IVF CAAS | 0            | 0        | 0            | 0            |
| R34 | 98-5    | Mesoamerican | +    | IVF CAAS | 0            | 0        | 0            | 0            |
| B35 | C18     | Mesoamerican | -    | IVF CAAS | 1            | 1        | 1            | 1            |
| B36 | C21     | Mesoamerican | +    | IVF CAAS | 1            | 1        | 1            | 1            |
| B37 | Shuang2 | Mesoamerican | -    | IVF CAAS | 1            | 1        | 1            | 1            |
| B38 | Shuang3 | Mesoamerican | -    | IVF CAAS | 1            | 1        | 1            | 1            |
| B39 | S1      | Mesoamerican | -    | IVF CAAS | 1            | 1        | 1            | 1            |
| B40 | H1      | Andean       | +    | IVF CAAS | 0            | 0        | 0            | 0            |
| B41 | H3      | Andean       | +    | IVF CAAS | 0            | 0        | 0            | 0            |
| B42 | H4      | Andean       | +    | IVF CAAS | 0            | 0        | 0            | 0            |
| B43 | C1      | Mesoamerican | -    | IVF CAAS | 0.82         | 1        | 0.21         | 1            |
| B44 | C2      | Andean       | +    | IVF CAAS | 0            | 0        | 0            | 0            |
| B45 | C4      | Mesoamerican | -    | IVF CAAS | 1            | 1        | 1            | 1            |
| B46 | C5      | Mesoamerican | -    | IVF CAAS | 1            | 1        | 1            | 1            |
| B47 | C8      | Mesoamerican | -    | IVF CAAS | 1            | 1        | 0.25         | 1            |
| B48 | C9      | Andean       | +    | IVF CAAS | 0.64         | 1        | 0.3          | 1            |
| B49 | C10     | Mesoamerican | -    | IVF CAAS | 1            | 1        | 1            | 1            |
| B50 | C11     | Mesoamerican | -    | IVF CAAS | 1            | 1        | 1            | 1            |
| B51 | C19     | Mesoamerican | -    | IVF CAAS | 1            | 1        | 1            | 1            |

|      |             |              |   |          |      |   |      |   |
|------|-------------|--------------|---|----------|------|---|------|---|
| B52  | C20         | Andean       | + | IVF CAAS | 0    | 0 | 0    | 0 |
| B53  | C22         | Andean       | + | IVF CAAS | 0    | 0 | 0    | 0 |
| B54  | C23         | Mesoamerican | - | IVF CAAS | 1    | 1 | 1    | 1 |
| B55  | C24         | Andean       | + | IVF CAAS | 0    | 0 | 0    | 0 |
| B56  | C26         | Mesoamerican | - | IVF CAAS | 1    | 1 | 1    | 1 |
| B57  | C29         | Andean       | + | IVF CAAS | 0    | 0 | 0    | 0 |
| B58  | K1          | Mesoamerican | + | IVF CAAS | 0    | 0 | 0    | 0 |
| B59  | K6          | Mesoamerican | - | IVF CAAS | 1    | 1 | 0.24 | 1 |
| B60  | D6          | Mesoamerican | - | IVF CAAS | 1    | 1 | 1    | 1 |
| B61  | T8          | Andean       | + | IVF CAAS | 0    | 0 | 0    | 0 |
| B62  | T20         | Andean       | + | IVF CAAS | 0    | 0 | 0    | 0 |
| B63  | 9100        | Mesoamerican | - | IVF CAAS | 1    | 1 | 1    | 1 |
| B64  | 9128 7A179  | Mesoamerican | - | IVF CAAS | 1    | 1 | 1    | 1 |
| B65  | 9240 7A1875 | Mesoamerican | - | IVF CAAS | 1    | 1 | 1    | 1 |
| B66  | 9251 7A1955 | Mesoamerican | - | IVF CAAS | 1    | 1 | 0.28 | 1 |
| B67  | 9252 7A1957 | Mesoamerican | - | IVF CAAS | 1    | 1 | 1    | 1 |
| B68  | 9270 7A237  | Mesoamerican | - | IVF CAAS | 1    | 1 | 1    | 1 |
| B69  | 9270 7A237  | Mesoamerican | - | IVF CAAS | 1    | 1 | 1    | 1 |
| B70  | 9272 7A240  | Mesoamerican | - | IVF CAAS | 1    | 1 | 1    | 1 |
| B71  | 7A431       | Mesoamerican | - | IVF CAAS | 1    | 1 | 1    | 1 |
| B72  | 7A140       | Andean       | - | IVF CAAS | 1    | 1 | 1    | 1 |
| B73  | 7A1834      | Mesoamerican | - | IVF CAAS | 1    | 1 | 0.31 | 1 |
| B74  | 7A1826      | Mesoamerican | - | IVF CAAS | 1    | 1 | 1    | 1 |
| B75  | 7A1423      | Andean       | + | IVF CAAS | 0    | 0 | 0    | 0 |
| B76  | 7A1086      | Mesoamerican | - | IVF CAAS | 1    | 1 | 0.34 | 1 |
| B77  | 7A1119      | Andean       | + | IVF CAAS | 0    | 0 | 0    | 0 |
| B78  | 9081        | Mesoamerican | - | IVF CAAS | 1    | 1 | 1    | 1 |
| B79  | 9244 7A1916 | Mesoamerican | - | IVF CAAS | 1    | 1 | 1    | 1 |
| B80  | C13         | Andean       | + | IVF CAAS | 0    | 0 | 0    | 0 |
| B81  | C14         | Mesoamerican | - | IVF CAAS | 1    | 1 | 1    | 1 |
| B82  | 9055        | Mesoamerican | - | IVF CAAS | 1    | 1 | 1    | 1 |
| B83  | C30         | Andean       | + | IVF CAAS | 0    | 0 | 0    | 0 |
| B84  | T5          | Andean       | + | IVF CAAS | 0    | 0 | 0    | 0 |
| B85  | T6ao        | Andean       | + | IVF CAAS | 0    | 0 | 0    | 0 |
| B86  | T6tu        | Andean       | + | IVF CAAS | 0    | 0 | 0    | 0 |
| B87  | C27         | Andean       | + | IVF CAAS | 0    | 0 | 0    | 0 |
| B88  | T7          | Andean       | + | IVF CAAS | 0    | 0 | 0    | 0 |
| B89  | 7A372       | Mesoamerican | - | IVF CAAS | 1    | 1 | 1    | 1 |
| B90  | C15         | Andean       | + | IVF CAAS | 0    | 0 | 0    | 0 |
| B91  | T6          | Andean       | + | IVF CAAS | 0    | 0 | 0    | 0 |
| B92  | K9          | Mesoamerican | - | IVF CAAS | 1    | 1 | 0.72 | 1 |
| B93  | T23         | Andean       | + | IVF CAAS | 0    | 0 | 0    | 0 |
| B94  | T3          | Andean       | + | IVF CAAS | 0    | 0 | 0    | 0 |
| B95  | C7          | Andean       | + | IVF CAAS | 0    | 0 | 0    | 0 |
| B96  | C17         | Andean       | + | IVF CAAS | 0.08 | 1 | 0.69 | 1 |
| B97  | 80-107      | Mesoamerican | - | IVF CAAS | 1    | 1 | 1    | 1 |
| B98  | C3          | Andean       | + | IVF CAAS | 0    | 0 | 0.54 | 1 |
| B99  | C12         | Andean       | + | IVF CAAS | 0    | 0 | 0    | 0 |
| B100 | C16         | Andean       | + | IVF CAAS | 0    | 0 | 0    | 0 |
| B101 | C6          | Andean       | + | IVF CAAS | 0    | 0 | 0    | 0 |
| B102 | T17         | Andean       | + | IVF CAAS | 0    | 0 | 0    | 0 |
| B103 | Shuangl     | Mesoamerican | - | IVF CAAS | 1    | 1 | 1    | 1 |
| B104 | T27         | Mesoamerican | - | IVF CAAS | 1    | 1 | 0.64 | 1 |
| B105 | H2          | Andean       | + | IVF CAAS | 0    | 0 | 0    | 0 |
| B106 | 2504        | Mesoamerican | + | IVF CAAS | 0.77 | 1 | 0.69 | 1 |
| B107 | V07A0978    | Mesoamerican | - | IVF CAAS | 1    | 1 | 1    | 1 |
| B108 | H7          | Andean       | + | IVF CAAS | 0    | 0 | 0    | 0 |
| B109 | H6          | Andean       | + | IVF CAAS | 0    | 0 | 0    | 0 |

|      |        |              |   |          |      |   |      |   |
|------|--------|--------------|---|----------|------|---|------|---|
| B110 | H5     | Andean       | + | IVF CAAS | 0    | 0 | 0    | 0 |
| B111 | K2     | Mesoamerican | - | IVF CAAS | 1    | 1 | 1    | 1 |
| B112 | 7A1795 | Mesoamerican | - | IVF CAAS | 1    | 1 | 1    | 1 |
| B113 | T22    | Andean       | + | IVF CAAS | 0.85 | 1 | 1    | 1 |
| B114 | H8     | Andean       | + | IVF CAAS | 0    | 0 | 0    | 0 |
| B115 | 7A394  | Mesoamerican | - | IVF CAAS | 1    | 1 | 1    | 1 |
| B116 | C25    | Andean       | + | IVF CAAS | 0    | 0 | 0    | 0 |
| B117 | 2404   | Mesoamerican | + | IVF CAAS | 0    | 0 | 0    | 0 |
| B118 | 86-2   | Mesoamerican | + | IVF CAAS | 0    | 0 | 0    | 0 |
| B119 | T32    | Andean       | + | IVF CAAS | 1    | 1 | 1    | 1 |
| B120 | 80-143 | Mesoamerican | - | IVF CAAS | 1    | 1 | 1    | 1 |
| B121 | C28    | Andean       | + | IVF CAAS | 0    | 0 | 0    | 0 |
| B122 | 19B1   | Mesoamerican | - | IVF CAAS | 1    | 1 | 1    | 1 |
| B123 | 19B2   | Mesoamerican | + | IVF CAAS | 0    | 0 | u    | u |
| B124 | 19B4   | Mesoamerican | - | IVF CAAS | 1    | 1 | 1    | 1 |
| B125 | 19B5   | Mesoamerican | - | IVF CAAS | 1    | 1 | 1    | 1 |
| B126 | 19B6   | Andean       | + | IVF CAAS | 0.04 | 1 | 0    | 0 |
| B127 | 19B7-1 | Andean       | + | IVF CAAS | 0    | 0 | 0    | 0 |
| B128 | 19B7-2 | Mesoamerican | - | IVF CAAS | 1    | 1 | 1    | 1 |
| B129 | 19B8   | Mesoamerican | - | IVF CAAS | 1    | 1 | 1    | 1 |
| B130 | 19B9   | Mesoamerican | - | IVF CAAS | 1    | 1 | u    | u |
| B131 | 19B10  | Mesoamerican | - | IVF CAAS | 1    | 1 | 0.71 | 1 |
| B132 | 19B11  | Mesoamerican | - | IVF CAAS | 1    | 1 | 1    | 1 |
| B133 | 19B12  | Mesoamerican | - | IVF CAAS | 1    | 1 | 0.83 | 1 |
| B134 | 19B13  | Mesoamerican | + | IVF CAAS | 0    | 0 | 0    | 0 |
| B135 | 19B14  | Mesoamerican | - | IVF CAAS | 1    | 1 | 1    | 1 |
| B136 | 19B15  | Mesoamerican | - | IVF CAAS | 1    | 1 | 0.68 | 1 |
| B137 | B20B1  | Mesoamerican | + | IVF CAAS | 0    | 0 | 0    | 0 |
| B138 | B20B2  | Mesoamerican | - | IVF CAAS | 1    | 1 | 1    | 1 |
| B139 | B20B3  | Andean       | + | IVF CAAS | 0    | 0 | 0    | 0 |

**Table S2.** Primer sequence used in qRT-PCR.

| Primer name | Primer sequence(5'-3')  |
|-------------|-------------------------|
| PvGUX1_1    | GGTTGAAGAAAGGCATGGATAAG |
|             | GCAGGTGGTGTGGAGTATAA    |
| Actin       | GAAGTTCTCT TCCAACCATCC  |
|             | TTCCTTGCTCATT CTGTCCG   |

**Table S3.** SNP distribution on chromosomes.

| Chromosome | Length of Chromosome(bp) | SNP number | SNP density (No./kb) |
|------------|--------------------------|------------|----------------------|
| Chr01      | 51433939                 | 360596     | 7.01                 |
| Chr02      | 49670989                 | 411294     | 8.28                 |
| Chr03      | 53438756                 | 384632     | 7.2                  |
| Chr04      | 48048378                 | 339438     | 7.06                 |
| Chr05      | 40923498                 | 278286     | 6.8                  |
| Chr06      | 31236378                 | 238452     | 7.63                 |
| Chr07      | 40041001                 | 269564     | 6.73                 |

|       |          |        |      |
|-------|----------|--------|------|
| Chr08 | 63048260 | 376474 | 5.97 |
| Chr09 | 38250102 | 310259 | 8.11 |
| Chr10 | 44302882 | 290060 | 6.55 |
| Chr11 | 53580169 | 330923 | 6.18 |

**Table S4.** LD decay on each chromosome.

| Chromosome | LD decay |
|------------|----------|
| Chr01      | 976,100  |
| Chr02      | 491,800  |
| Chr03      | 478,700  |
| Chr04      | 350,300  |
| Chr05      | 284,100  |
| Chr06      | 904,100  |
| Chr07      | 546,000  |
| Chr08      | 473,300  |
| Chr09      | 876,300  |
| Chr10      | 184,100  |
| Chr11      | 963,000  |

**Table S5.** Significantly association signal for four traits by GWAS analysis.

| Traits   | SNP       | Chromosome | Position | P.value  | Rsquare.of.Model.<br>without.SNP | Rsquare.of.Model.<br>el.with.SNP |
|----------|-----------|------------|----------|----------|----------------------------------|----------------------------------|
| ST1-2019 | SNP709759 | Chr02      | 44026689 | 8.34E-11 | 0.66408708                       | 0.809364444                      |
| ST1-2019 | SNP710876 | Chr02      | 44194695 | 4.22E-10 | 0.66408708                       | 0.796539037                      |
| ST1-2019 | SNP711816 | Chr02      | 44328013 | 6.69E-10 | 0.66408708                       | 0.792947758                      |
| ST1-2019 | SNP711895 | Chr02      | 44336662 | 7.34E-10 | 0.66408708                       | 0.792232159                      |
| ST1-2019 | SNP709536 | Chr02      | 44002717 | 7.36E-10 | 0.66408708                       | 0.79221138                       |
| ST1-2019 | SNP711217 | Chr02      | 44248269 | 8.14E-10 | 0.66408708                       | 0.791438515                      |
| ST1-2019 | SNP710933 | Chr02      | 44206976 | 8.15E-10 | 0.66408708                       | 0.791427149                      |
| ST1-2019 | SNP711387 | Chr02      | 44282675 | 8.25E-10 | 0.66408708                       | 0.791333946                      |
| ST1-2019 | SNP709538 | Chr02      | 44002794 | 8.42E-10 | 0.66408708                       | 0.791176773                      |
| ST1-2019 | SNP709539 | Chr02      | 44002817 | 8.42E-10 | 0.66408708                       | 0.791176773                      |

|          |           |       |          |          |            |             |
|----------|-----------|-------|----------|----------|------------|-------------|
| ST1-2019 | SNP709540 | Chr02 | 44002827 | 8.42E-10 | 0.66408708 | 0.791176773 |
| ST1-2019 | SNP709541 | Chr02 | 44002840 | 8.42E-10 | 0.66408708 | 0.791176773 |
| ST1-2019 | SNP711694 | Chr02 | 44321072 | 8.42E-10 | 0.66408708 | 0.791176773 |
| ST1-2019 | SNP712010 | Chr02 | 44370231 | 1.46E-09 | 0.66408708 | 0.786975435 |
| ST1-2019 | SNP711219 | Chr02 | 44248320 | 1.69E-09 | 0.66408708 | 0.785822964 |
| ST1-2019 | SNP711220 | Chr02 | 44248346 | 1.69E-09 | 0.66408708 | 0.785822964 |
| ST1-2019 | SNP711221 | Chr02 | 44248367 | 1.69E-09 | 0.66408708 | 0.785822964 |
| ST1-2019 | SNP711222 | Chr02 | 44248372 | 1.69E-09 | 0.66408708 | 0.785822964 |
| ST1-2019 | SNP711218 | Chr02 | 44248299 | 2.29E-09 | 0.66408708 | 0.783553738 |
| ST1-2019 | SNP711944 | Chr02 | 44353434 | 2.30E-09 | 0.66408708 | 0.783510915 |
| ST1-2019 | SNP710706 | Chr02 | 44169322 | 2.34E-09 | 0.66408708 | 0.783360845 |
| ST1-2019 | SNP712825 | Chr02 | 44491321 | 2.82E-09 | 0.66408708 | 0.781978564 |
| ST1-2019 | SNP709797 | Chr02 | 44031896 | 2.87E-09 | 0.66408708 | 0.781841832 |
| ST1-2019 | SNP709798 | Chr02 | 44031898 | 2.87E-09 | 0.66408708 | 0.781841832 |
| ST1-2019 | SNP709799 | Chr02 | 44031901 | 2.87E-09 | 0.66408708 | 0.781841832 |
| ST1-2019 | SNP711609 | Chr02 | 44318734 | 3.39E-09 | 0.66408708 | 0.780580849 |
| ST1-2019 | SNP711611 | Chr02 | 44318755 | 3.39E-09 | 0.66408708 | 0.780580849 |
| ST1-2019 | SNP709727 | Chr02 | 44022619 | 4.06E-09 | 0.66408708 | 0.779234572 |
| ST1-2019 | SNP709537 | Chr02 | 44002751 | 4.37E-09 | 0.66408708 | 0.778672472 |
| ST1-2019 | SNP711044 | Chr02 | 44219414 | 4.96E-09 | 0.66408708 | 0.77772635  |
| ST1-2019 | SNP710014 | Chr02 | 44075208 | 5.19E-09 | 0.66408708 | 0.777400934 |
| ST1-2019 | SNP709519 | Chr02 | 44001188 | 5.27E-09 | 0.66408708 | 0.777287553 |



|          |           |       |          |          |            |             |
|----------|-----------|-------|----------|----------|------------|-------------|
| ST1-2019 | SNP709591 | Chr02 | 44007852 | 5.27E-09 | 0.66408708 | 0.777287553 |
| ST1-2019 | SNP709741 | Chr02 | 44025318 | 5.27E-09 | 0.66408708 | 0.777287553 |
| ST1-2019 | SNP709764 | Chr02 | 44027832 | 5.27E-09 | 0.66408708 | 0.777287553 |
| ST1-2019 | SNP709767 | Chr02 | 44028010 | 5.27E-09 | 0.66408708 | 0.777287553 |
| ST1-2019 | SNP709893 | Chr02 | 44052567 | 5.27E-09 | 0.66408708 | 0.777287553 |
| ST1-2019 | SNP709894 | Chr02 | 44052573 | 5.27E-09 | 0.66408708 | 0.777287553 |
| ST1-2019 | SNP709922 | Chr02 | 44062112 | 5.27E-09 | 0.66408708 | 0.777287553 |
| ST1-2019 | SNP710125 | Chr02 | 44087774 | 5.27E-09 | 0.66408708 | 0.777287553 |
| ST1-2019 | SNP710126 | Chr02 | 44087811 | 5.27E-09 | 0.66408708 | 0.777287553 |
| ST1-2019 | SNP710127 | Chr02 | 44087825 | 5.27E-09 | 0.66408708 | 0.777287553 |
| ST1-2019 | SNP710312 | Chr02 | 44116457 | 5.27E-09 | 0.66408708 | 0.777287553 |
| ST1-2019 | SNP710313 | Chr02 | 44116481 | 5.27E-09 | 0.66408708 | 0.777287553 |
| ST1-2019 | SNP710314 | Chr02 | 44116482 | 5.27E-09 | 0.66408708 | 0.777287553 |
| ST1-2019 | SNP710430 | Chr02 | 44124153 | 5.27E-09 | 0.66408708 | 0.777287553 |
| ST1-2019 | SNP710435 | Chr02 | 44124331 | 5.27E-09 | 0.66408708 | 0.777287553 |
| ST1-2019 | SNP710511 | Chr02 | 44134874 | 5.27E-09 | 0.66408708 | 0.777287553 |
| ST1-2019 | SNP710512 | Chr02 | 44134877 | 5.27E-09 | 0.66408708 | 0.777287553 |
| ST1-2019 | SNP710583 | Chr02 | 44142506 | 5.27E-09 | 0.66408708 | 0.777287553 |
| ST1-2019 | SNP710584 | Chr02 | 44142508 | 5.27E-09 | 0.66408708 | 0.777287553 |
| ST1-2019 | SNP710585 | Chr02 | 44142510 | 5.27E-09 | 0.66408708 | 0.777287553 |
| ST1-2019 | SNP710913 | Chr02 | 44198506 | 5.27E-09 | 0.66408708 | 0.777287553 |
| ST1-2019 | SNP710976 | Chr02 | 44215281 | 5.27E-09 | 0.66408708 | 0.777287553 |



|          |           |       |          |          |            |             |
|----------|-----------|-------|----------|----------|------------|-------------|
| ST1-2019 | SNP710977 | Chr02 | 44215287 | 5.27E-09 | 0.66408708 | 0.777287553 |
| ST1-2019 | SNP711125 | Chr02 | 44233252 | 5.27E-09 | 0.66408708 | 0.777287553 |
| ST1-2019 | SNP711137 | Chr02 | 44236154 | 5.27E-09 | 0.66408708 | 0.777287553 |
| ST1-2019 | SNP711240 | Chr02 | 44250218 | 5.27E-09 | 0.66408708 | 0.777287553 |
| ST1-2019 | SNP711445 | Chr02 | 44284893 | 5.27E-09 | 0.66408708 | 0.777287553 |
| ST1-2019 | SNP711546 | Chr02 | 44298694 | 5.27E-09 | 0.66408708 | 0.777287553 |
| ST1-2019 | SNP711547 | Chr02 | 44298699 | 5.27E-09 | 0.66408708 | 0.777287553 |
| ST1-2019 | SNP711591 | Chr02 | 44301978 | 5.27E-09 | 0.66408708 | 0.777287553 |
| ST1-2019 | SNP711697 | Chr02 | 44321080 | 5.27E-09 | 0.66408708 | 0.777287553 |
| ST1-2019 | SNP711720 | Chr02 | 44321354 | 5.27E-09 | 0.66408708 | 0.777287553 |
| ST1-2019 | SNP711721 | Chr02 | 44321405 | 5.27E-09 | 0.66408708 | 0.777287553 |
| ST1-2019 | SNP711725 | Chr02 | 44321473 | 5.27E-09 | 0.66408708 | 0.777287553 |
| ST1-2019 | SNP711873 | Chr02 | 44332589 | 5.27E-09 | 0.66408708 | 0.777287553 |
| ST1-2019 | SNP712120 | Chr02 | 44381836 | 5.27E-09 | 0.66408708 | 0.777287553 |
| ST1-2019 | SNP712181 | Chr02 | 44387934 | 5.27E-09 | 0.66408708 | 0.777287553 |
| ST1-2019 | SNP712356 | Chr02 | 44411445 | 5.27E-09 | 0.66408708 | 0.777287553 |
| ST1-2019 | SNP712580 | Chr02 | 44454963 | 5.27E-09 | 0.66408708 | 0.777287553 |
| ST1-2019 | SNP712581 | Chr02 | 44455001 | 5.27E-09 | 0.66408708 | 0.777287553 |
| ST1-2019 | SNP712638 | Chr02 | 44460429 | 5.27E-09 | 0.66408708 | 0.777287553 |
| ST1-2019 | SNP712639 | Chr02 | 44460430 | 5.27E-09 | 0.66408708 | 0.777287553 |
| ST1-2019 | SNP712651 | Chr02 | 44460809 | 5.27E-09 | 0.66408708 | 0.777287553 |
| ST1-2019 | SNP712822 | Chr02 | 44485863 | 5.27E-09 | 0.66408708 | 0.777287553 |

|          |           |       |          |          |            |             |
|----------|-----------|-------|----------|----------|------------|-------------|
| ST1-2019 | SNP709758 | Chr02 | 44026581 | 5.31E-09 | 0.66408708 | 0.777218034 |
| ST1-2019 | SNP711356 | Chr02 | 44274949 | 5.61E-09 | 0.66408708 | 0.776810251 |
| ST1-2019 | SNP710484 | Chr02 | 44131778 | 6.25E-09 | 0.66408708 | 0.776013424 |
| ST1-2019 | SNP710021 | Chr02 | 44075340 | 6.29E-09 | 0.66408708 | 0.775960942 |
| ST1-2019 | SNP712733 | Chr02 | 44467441 | 6.72E-09 | 0.66408708 | 0.775478009 |
| ST1-2019 | SNP710148 | Chr02 | 44090056 | 7.38E-09 | 0.66408708 | 0.77478214  |
| ST1-2019 | SNP709736 | Chr02 | 44024697 | 7.44E-09 | 0.66408708 | 0.774723688 |
| ST1-2019 | SNP709760 | Chr02 | 44026855 | 7.81E-09 | 0.66408708 | 0.774361094 |
| ST1-2019 | SNP712767 | Chr02 | 44478239 | 8.08E-09 | 0.66408708 | 0.774111105 |
| ST1-2019 | SNP712532 | Chr02 | 44449855 | 8.40E-09 | 0.66408708 | 0.773818426 |
| ST1-2019 | SNP711839 | Chr02 | 44328846 | 8.94E-09 | 0.66408708 | 0.773361029 |
| ST1-2019 | SNP709988 | Chr02 | 44072693 | 9.19E-09 | 0.66408708 | 0.773157131 |
| ST1-2019 | SNP710875 | Chr02 | 44194660 | 9.19E-09 | 0.66408708 | 0.773157131 |
| ST1-2019 | SNP712650 | Chr02 | 44460803 | 9.27E-09 | 0.66408708 | 0.773091091 |
| ST1-2019 | SNP712835 | Chr02 | 44492061 | 9.33E-09 | 0.66408708 | 0.773046164 |
| ST1-2019 | SNP710124 | Chr02 | 44087741 | 9.42E-09 | 0.66408708 | 0.772971189 |
| ST1-2019 | SNP709575 | Chr02 | 44006128 | 9.92E-09 | 0.66408708 | 0.772592204 |
| ST1-2019 | SNP709576 | Chr02 | 44006140 | 9.92E-09 | 0.66408708 | 0.772592204 |
| ST1-2019 | SNP709593 | Chr02 | 44008205 | 9.92E-09 | 0.66408708 | 0.772592204 |
| ST1-2019 | SNP709594 | Chr02 | 44008228 | 9.92E-09 | 0.66408708 | 0.772592204 |
| ST1-2019 | SNP709650 | Chr02 | 44015271 | 9.92E-09 | 0.66408708 | 0.772592204 |
| ST1-2019 | SNP709738 | Chr02 | 44025236 | 9.92E-09 | 0.66408708 | 0.772592204 |

|          |           |       |          |          |            |             |
|----------|-----------|-------|----------|----------|------------|-------------|
| ST1-2019 | SNP709739 | Chr02 | 44025250 | 9.92E-09 | 0.66408708 | 0.772592204 |
| ST1-2019 | SNP709740 | Chr02 | 44025268 | 9.92E-09 | 0.66408708 | 0.772592204 |
| ST1-2019 | SNP709744 | Chr02 | 44025440 | 9.92E-09 | 0.66408708 | 0.772592204 |
| ST1-2019 | SNP709745 | Chr02 | 44025441 | 9.92E-09 | 0.66408708 | 0.772592204 |
| ST1-2019 | SNP709746 | Chr02 | 44025480 | 9.92E-09 | 0.66408708 | 0.772592204 |
| ST1-2019 | SNP709747 | Chr02 | 44025483 | 9.92E-09 | 0.66408708 | 0.772592204 |
| ST1-2019 | SNP709748 | Chr02 | 44025484 | 9.92E-09 | 0.66408708 | 0.772592204 |
| ST1-2019 | SNP709814 | Chr02 | 44044002 | 9.92E-09 | 0.66408708 | 0.772592204 |
| ST1-2019 | SNP709827 | Chr02 | 44045115 | 9.92E-09 | 0.66408708 | 0.772592204 |
| ST1-2019 | SNP709832 | Chr02 | 44045457 | 9.92E-09 | 0.66408708 | 0.772592204 |
| ST1-2019 | SNP709897 | Chr02 | 44053119 | 9.92E-09 | 0.66408708 | 0.772592204 |
| ST1-2019 | SNP709898 | Chr02 | 44053121 | 9.92E-09 | 0.66408708 | 0.772592204 |
| ST1-2019 | SNP710089 | Chr02 | 44082467 | 9.92E-09 | 0.66408708 | 0.772592204 |
| ST1-2019 | SNP710090 | Chr02 | 44082487 | 9.92E-09 | 0.66408708 | 0.772592204 |
| ST1-2019 | SNP710128 | Chr02 | 44087845 | 9.92E-09 | 0.66408708 | 0.772592204 |
| ST1-2019 | SNP710162 | Chr02 | 44092347 | 9.92E-09 | 0.66408708 | 0.772592204 |
| ST1-2019 | SNP710163 | Chr02 | 44092369 | 9.92E-09 | 0.66408708 | 0.772592204 |
| ST1-2019 | SNP710201 | Chr02 | 44095520 | 9.92E-09 | 0.66408708 | 0.772592204 |
| ST1-2019 | SNP710453 | Chr02 | 44128117 | 9.92E-09 | 0.66408708 | 0.772592204 |
| ST1-2019 | SNP710454 | Chr02 | 44128763 | 9.92E-09 | 0.66408708 | 0.772592204 |
| ST1-2019 | SNP710468 | Chr02 | 44130082 | 9.92E-09 | 0.66408708 | 0.772592204 |
| ST1-2019 | SNP710541 | Chr02 | 44137836 | 9.92E-09 | 0.66408708 | 0.772592204 |

|          |           |       |          |          |            |             |
|----------|-----------|-------|----------|----------|------------|-------------|
| ST1-2019 | SNP710576 | Chr02 | 44142293 | 9.92E-09 | 0.66408708 | 0.772592204 |
| ST1-2019 | SNP710586 | Chr02 | 44142549 | 9.92E-09 | 0.66408708 | 0.772592204 |
| ST1-2019 | SNP710587 | Chr02 | 44142555 | 9.92E-09 | 0.66408708 | 0.772592204 |
| ST1-2019 | SNP710646 | Chr02 | 44149334 | 9.92E-09 | 0.66408708 | 0.772592204 |
| ST1-2019 | SNP710743 | Chr02 | 44175716 | 9.92E-09 | 0.66408708 | 0.772592204 |
| ST1-2019 | SNP710744 | Chr02 | 44175729 | 9.92E-09 | 0.66408708 | 0.772592204 |
| ST1-2019 | SNP710941 | Chr02 | 44209255 | 9.92E-09 | 0.66408708 | 0.772592204 |
| ST1-2019 | SNP711143 | Chr02 | 44238327 | 9.92E-09 | 0.66408708 | 0.772592204 |
| ST1-2019 | SNP711152 | Chr02 | 44240813 | 9.92E-09 | 0.66408708 | 0.772592204 |
| ST1-2019 | SNP711171 | Chr02 | 44243617 | 9.92E-09 | 0.66408708 | 0.772592204 |
| ST1-2019 | SNP711203 | Chr02 | 44247472 | 9.92E-09 | 0.66408708 | 0.772592204 |
| ST1-2019 | SNP711241 | Chr02 | 44250344 | 9.92E-09 | 0.66408708 | 0.772592204 |
| ST1-2019 | SNP711358 | Chr02 | 44276504 | 9.92E-09 | 0.66408708 | 0.772592204 |
| ST1-2019 | SNP711482 | Chr02 | 44288382 | 9.92E-09 | 0.66408708 | 0.772592204 |
| ST1-2019 | SNP711532 | Chr02 | 44296998 | 9.92E-09 | 0.66408708 | 0.772592204 |
| ST1-2019 | SNP711605 | Chr02 | 44318480 | 9.92E-09 | 0.66408708 | 0.772592204 |
| ST1-2019 | SNP711606 | Chr02 | 44318504 | 9.92E-09 | 0.66408708 | 0.772592204 |
| ST1-2019 | SNP711696 | Chr02 | 44321079 | 9.92E-09 | 0.66408708 | 0.772592204 |
| ST1-2019 | SNP711770 | Chr02 | 44325477 | 9.92E-09 | 0.66408708 | 0.772592204 |
| ST1-2019 | SNP711776 | Chr02 | 44325919 | 9.92E-09 | 0.66408708 | 0.772592204 |
| ST1-2019 | SNP711968 | Chr02 | 44361810 | 9.92E-09 | 0.66408708 | 0.772592204 |
| ST1-2019 | SNP712015 | Chr02 | 44370987 | 9.92E-09 | 0.66408708 | 0.772592204 |

|          |           |       |          |          |            |             |
|----------|-----------|-------|----------|----------|------------|-------------|
| ST1-2019 | SNP712016 | Chr02 | 44371014 | 9.92E-09 | 0.66408708 | 0.772592204 |
| ST1-2019 | SNP712017 | Chr02 | 44371018 | 9.92E-09 | 0.66408708 | 0.772592204 |
| ST1-2019 | SNP712047 | Chr02 | 44373336 | 9.92E-09 | 0.66408708 | 0.772592204 |
| ST1-2019 | SNP712048 | Chr02 | 44373344 | 9.92E-09 | 0.66408708 | 0.772592204 |
| ST1-2019 | SNP712121 | Chr02 | 44381939 | 9.92E-09 | 0.66408708 | 0.772592204 |
| ST1-2019 | SNP712187 | Chr02 | 44387969 | 9.92E-09 | 0.66408708 | 0.772592204 |
| ST1-2019 | SNP712188 | Chr02 | 44387986 | 9.92E-09 | 0.66408708 | 0.772592204 |
| ST1-2019 | SNP712189 | Chr02 | 44388002 | 9.92E-09 | 0.66408708 | 0.772592204 |
| ST1-2019 | SNP712229 | Chr02 | 44389485 | 9.92E-09 | 0.66408708 | 0.772592204 |
| ST1-2019 | SNP712239 | Chr02 | 44390426 | 9.92E-09 | 0.66408708 | 0.772592204 |
| ST1-2019 | SNP712292 | Chr02 | 44398152 | 9.92E-09 | 0.66408708 | 0.772592204 |
| ST1-2019 | SNP712293 | Chr02 | 44398154 | 9.92E-09 | 0.66408708 | 0.772592204 |
| ST1-2019 | SNP712294 | Chr02 | 44398224 | 9.92E-09 | 0.66408708 | 0.772592204 |
| ST1-2019 | SNP712590 | Chr02 | 44456407 | 9.92E-09 | 0.66408708 | 0.772592204 |
| ST1-2019 | SNP712637 | Chr02 | 44460356 | 9.92E-09 | 0.66408708 | 0.772592204 |
| ST1-2019 | SNP712668 | Chr02 | 44461729 | 9.92E-09 | 0.66408708 | 0.772592204 |
| ST1-2019 | SNP712669 | Chr02 | 44461743 | 9.92E-09 | 0.66408708 | 0.772592204 |
| ST1-2019 | SNP712670 | Chr02 | 44461757 | 9.92E-09 | 0.66408708 | 0.772592204 |
| ST1-2019 | SNP712741 | Chr02 | 44469352 | 9.92E-09 | 0.66408708 | 0.772592204 |
| ST1-2019 | SNP712744 | Chr02 | 44472356 | 9.92E-09 | 0.66408708 | 0.772592204 |
| ST1-2019 | SNP712757 | Chr02 | 44476014 | 9.92E-09 | 0.66408708 | 0.772592204 |
| ST1-2019 | SNP712777 | Chr02 | 44483735 | 9.92E-09 | 0.66408708 | 0.772592204 |

|          |           |       |          |          |            |             |
|----------|-----------|-------|----------|----------|------------|-------------|
| ST1-2019 | SNP712842 | Chr02 | 44492496 | 9.92E-09 | 0.66408708 | 0.772592204 |
| ST1-2019 | SNP711284 | Chr02 | 44254302 | 1.02E-08 | 0.66408708 | 0.772397739 |
| ST1-2019 | SNP711533 | Chr02 | 44297127 | 1.02E-08 | 0.66408708 | 0.772397739 |
| ST1-2019 | SNP711722 | Chr02 | 44321421 | 1.02E-08 | 0.66408708 | 0.772397739 |
| ST1-2019 | SNP711723 | Chr02 | 44321445 | 1.02E-08 | 0.66408708 | 0.772397739 |
| ST1-2019 | SNP711724 | Chr02 | 44321446 | 1.02E-08 | 0.66408708 | 0.772397739 |
| ST1-2019 | SNP709265 | Chr02 | 43982152 | 1.07E-08 | 0.66408708 | 0.772011841 |
| ST1-2019 | SNP712698 | Chr02 | 44463539 | 1.09E-08 | 0.66408708 | 0.77190982  |
| ST1-2019 | SNP711610 | Chr02 | 44318748 | 1.09E-08 | 0.66408708 | 0.771900621 |
| ST1-2019 | SNP712182 | Chr02 | 44387942 | 1.10E-08 | 0.66408708 | 0.771844521 |
| ST1-2019 | SNP712183 | Chr02 | 44387943 | 1.10E-08 | 0.66408708 | 0.771844521 |
| ST1-2019 | SNP710001 | Chr02 | 44073270 | 1.12E-08 | 0.66408708 | 0.771732419 |
| ST1-2019 | SNP711929 | Chr02 | 44348187 | 1.16E-08 | 0.66408708 | 0.771445978 |
| ST1-2019 | SNP708766 | Chr02 | 43917710 | 1.19E-08 | 0.66408708 | 0.771230959 |
| ST1-2019 | SNP712111 | Chr02 | 44378392 | 1.21E-08 | 0.66408708 | 0.771115718 |
| ST1-2019 | SNP710877 | Chr02 | 44195229 | 1.26E-08 | 0.66408708 | 0.770816928 |
| ST1-2019 | SNP712603 | Chr02 | 44458123 | 1.27E-08 | 0.66408708 | 0.770791425 |
| ST1-2019 | SNP712604 | Chr02 | 44458132 | 1.27E-08 | 0.66408708 | 0.770791425 |
| ST1-2019 | SNP709644 | Chr02 | 44014828 | 1.31E-08 | 0.66408708 | 0.770543644 |
| ST1-2019 | SNP709917 | Chr02 | 44061478 | 1.31E-08 | 0.66408708 | 0.770543644 |
| ST1-2019 | SNP709986 | Chr02 | 44072663 | 1.31E-08 | 0.66408708 | 0.770543644 |
| ST1-2019 | SNP710005 | Chr02 | 44073583 | 1.31E-08 | 0.66408708 | 0.770543644 |

|          |            |       |          |          |             |             |
|----------|------------|-------|----------|----------|-------------|-------------|
| ST1-2019 | SNP710176  | Chr02 | 44093595 | 1.31E-08 | 0.66408708  | 0.770543644 |
| ST1-2019 | SNP710177  | Chr02 | 44093598 | 1.31E-08 | 0.66408708  | 0.770543644 |
| ST1-2019 | SNP710211  | Chr02 | 44096855 | 1.31E-08 | 0.66408708  | 0.770543644 |
| ST1-2019 | SNP710410  | Chr02 | 44123138 | 1.31E-08 | 0.66408708  | 0.770543644 |
| ST1-2019 | SNP710637  | Chr02 | 44149038 | 1.31E-08 | 0.66408708  | 0.770543644 |
| ST1-2019 | SNP711191  | Chr02 | 44246953 | 1.31E-08 | 0.66408708  | 0.770543644 |
| ST1-2019 | SNP711239  | Chr02 | 44250142 | 1.31E-08 | 0.66408708  | 0.770543644 |
| ST1-2019 | SNP711542  | Chr02 | 44298186 | 1.31E-08 | 0.66408708  | 0.770543644 |
| ST1-2019 | SNP711543  | Chr02 | 44298190 | 1.31E-08 | 0.66408708  | 0.770543644 |
| ST1-2019 | SNP711544  | Chr02 | 44298191 | 1.31E-08 | 0.66408708  | 0.770543644 |
| ST1-2019 | SNP711545  | Chr02 | 44298252 | 1.31E-08 | 0.66408708  | 0.770543644 |
| ST1-2019 | SNP712030  | Chr02 | 44371636 | 1.31E-08 | 0.66408708  | 0.770543644 |
| ST1-2019 | SNP712050  | Chr02 | 44373550 | 1.31E-08 | 0.66408708  | 0.770543644 |
| ST1-2019 | SNP712236  | Chr02 | 44389680 | 1.31E-08 | 0.66408708  | 0.770543644 |
| ST1-2019 | SNP712388  | Chr02 | 44413801 | 1.31E-08 | 0.66408708  | 0.770543644 |
| ST1-2019 | SNP712391  | Chr02 | 44413984 | 1.31E-08 | 0.66408708  | 0.770543644 |
| ST1-2019 | SNP712746  | Chr02 | 44473271 | 1.31E-08 | 0.66408708  | 0.770543644 |
| ST1-2019 | SNP712813  | Chr02 | 44485663 | 1.31E-08 | 0.66408708  | 0.770543644 |
| ST1-2019 | SNP3507295 | Chr11 | 45106268 | 1.36E-08 | 0.66408708  | 0.770257469 |
| ST2-2019 | SNP711217  | Chr02 | 44248269 | 2.53E-09 | 0.600682726 | 0.721525683 |
| ST2-2019 | SNP711816  | Chr02 | 44328013 | 3.64E-09 | 0.600682726 | 0.718421253 |
| ST1-2020 | SNP710871  | Chr02 | 44194640 | 3.26E-09 | 0.542944548 | 0.691796257 |



|          |           |       |          |          |             |             |
|----------|-----------|-------|----------|----------|-------------|-------------|
| ST2-2020 | SNP710871 | Chr02 | 44194640 | 2.42E-10 | 0.589833533 | 0.783118593 |
| ST2-2020 | SNP709736 | Chr02 | 44024697 | 4.73E-09 | 0.589833533 | 0.747499937 |
